# Supplementary material
Source: PubMed Central journal article supplement (PMC2903393)
Supplement: supp_M110.107243_jbc.M110.107243-1.pdf [file supp_M110.107243_jbc.M110.107243-1.pdf]

**Table S1. Oligonucleotide Primers**

| Application                                                      | S/AS* | Sequence (5'-3') <sup>†</sup>                             | Notes                                                                                   |
|------------------------------------------------------------------|-------|-----------------------------------------------------------|-----------------------------------------------------------------------------------------|
| RT-PCR to define 5' ends of <i>Tg</i> PBGS3 ORF                  | S     | 1 ATGCGTCCTCTCTCGCTTTTCTTCC 25                            | 5' UTR                                                                                  |
|                                                                  | AS1   | 4233 GAGGGCGTCTTGAATGGGAAGCC 4210                         | conserved PBGS sequence (in exon 3)                                                     |
|                                                                  | AS2   | 4913 ATCGAGGGAATCGGCACACTCG 4892                          | conserved PBGS sequence (in exon 4)                                                     |
| RT-PCR to define 5' end of <i>Tg</i> SPP ORF                     | S     | 1 ATGCGTCCTCTCTCGCTTTTCTTCC 25                            | 5' UTR                                                                                  |
|                                                                  | AS1   | 11088 AGCGACCCTGGAGGGTACGCATGGGG 11063                    | conserved SPP sequence (in exon 8)                                                      |
|                                                                  | AS2   | 11148 ATGCCGCGCTCGTCTCTCCCTCGCTGG 11121                   | conserved SPP sequence (in exon 8)                                                      |
|                                                                  | AS3   | 11208 CGAATCAAGGCCTCTCGCTTTCGACTGC 11181                  | conserved SPP sequence (in exon 8)                                                      |
| <i>Tg</i> PBGS3 Q-PCR (Fig. 1B)                                  | S     | 6246 CTGTGCAAACAGGCGATTACGCTT 6687                        | spans splice junction of exons 5 and 6<br>conserved PBGS sequence (in exon 6)           |
|                                                                  | AS    | 6780 TGTGCAACCTTCCATGTCGAGAGA 6757                        |                                                                                         |
| <i>Tg</i> SPP Q-PCR (Fig. 1B)                                    | S     | 11148 TCGCCCATCTCTGCGAACATATCA 11171                      | conserved SPP sequence (in exon 8)                                                      |
|                                                                  | AS    | 11236 TGTGTACGCGTTGGTTTCTGCTTG 11213                      | conserved SPP sequence (in exon 8)                                                      |
| RACE to define 5' ends of <i>Tg</i> PBGS1/2/3 transcripts        | S     | <u>AAGCAGTGGTATCAACGCAGAGT</u>                            | upstream vector primer (Clontech)                                                       |
|                                                                  | AS1   | 5037 AGCATGAACGCCTTGATGCCGTAGCTTCGGGC 4966                | conserved PBGS sequence (in exon 4)                                                     |
|                                                                  | AS2   | 4964 TCGCCACCTCCTTCAACAGATCTTCC 4938                      | nested, just upstream of AS1                                                            |
| RT-PCR to assess <i>Tg</i> PBGS transcription (Fig. 1D)          | S     | 6797 CCTACTCTGCAAATACGCCTCCTCGTTC 6825                    | in exon 6                                                                               |
|                                                                  | AS    | 7937 TAGCAGGGTCTGTAAACTTCTGCGTTC 7909                     | in exon 7                                                                               |
| wild-type <i>Tg</i> PBGS3 for enzymatic studies (Fig. 1F)        | S     | 4165 <u>TATACATATGACGCCACGGGGCCCTCGAC</u> 4187            | <i>Nde</i> I & <i>Bam</i> HI sites introduced<br>for bacterial expression vector        |
|                                                                  | AS    | 7941 <u>GATGGATCCTT</u> AGTAGCAGGGTTCTGTAAACTTCTGC 7914   |                                                                                         |
| <i>Tg</i> PBGS3 C-terminal deletion for enzyme studies (Fig. 1F) | S     | 4165 <u>TATACATATGACGCCACGGGGCCCTCGAC</u> 4187            | <i>Nde</i> I & <i>Bam</i> HI sites introduced<br>for bacterial expression vector        |
|                                                                  | AS    | 7899 <u>GATGGATCCTT</u> ACTCGACCATCCATTTGGCCGCC 7878      |                                                                                         |
| <i>Tg</i> PBGS <sub>L394</sub> -eGFP for localization (Fig. 1E)  | S     | -105 <u>CGAGATCTAAAATG</u> AGCTTCTTCCTCCTGTTCTTTCTCC -78  | from upstream ATG through exon 4;<br><i>Bgl</i> II & <i>Avr</i> II for pTub Toxo vector |
|                                                                  | AS    | 4998 <u>GGCTAGGGAG</u> CATGAACGCCTTGATGCCGTAGCTTCGG 4968  |                                                                                         |
| <i>Tg</i> PBGS-GST-HA to map N-ter processing (Fig. 1F)          | S     | -105 <u>CGGGATCCAAAATG</u> AGCTTCTTCCTCCTGTTCTTTCTCC -78  | from upstream ATG through exon 4;<br><i>Bam</i> HI & <i>Spe</i> I for GST-HA vector     |
|                                                                  | AS    | 4998 <u>GGACTAGT</u> GAGCATGAACGCCTTGATGCCGTAGCTTCGG 4968 |                                                                                         |
| <i>Tg</i> PBGS-His6 for antibody production                      | S     | 4912 <u>GGATCCATG</u> CCTGGCCAAAGTCGTC 4930               | conserved region from exons 4-7;<br><i>Bam</i> HI sites for His6 vector                 |
|                                                                  | AS    | 7938 <u>GGATCCG</u> TAGCAGGGTTCTGTAAACTTCTGC 7914         |                                                                                         |

\* Sense (same strand) or antisense (opposite strand) relative to mRNA.

<sup>†</sup> Underlining indicates vector/linker sequences; nucleotide positions refer to genomic DNA, relative to the presumed translational initiation site of *Tg*PBGS3; restriction sites shown in italics, start and stop codons in bold.

**Table S2. Purification of recombinant *TgPBGS* and *TgPBGSDC***

| Protein                  | Column           | Volume (ml) | Protein (mg) | Specific Activity ( $\mu\text{mol/hr/mg}$ ) | Yield ( $\mu\text{mol/hr}$ ) |
|--------------------------|------------------|-------------|--------------|---------------------------------------------|------------------------------|
| <i>TgPBGS</i>            | phenyl sepharose | 90          | 90           | 15.0 <sup>*</sup>                           | 1350                         |
|                          | Q-sepharose      | 40          | 50           | 20.9 <sup>*</sup>                           | 1045                         |
| <i>TgPBGS</i> $\Delta$ C | phenyl sepharose | 40          | 100          | 0.22 <sup>†</sup>                           | 22                           |
|                          | Q-sepharose      | 40          | 16.4         | 0.84 <sup>†</sup>                           | 14                           |

\* Assays run 20 min with 5  $\mu\text{g}$  protein from individual fractions; data represent the average of pooled fractions.

<sup>†</sup> Assays run 8 min with 50  $\mu\text{g}$  protein from pooled fractions.

# Shanmugam *et al*, Figure S1

|                  |                                   |                                  |                |          |                                    |
|------------------|-----------------------------------|----------------------------------|----------------|----------|------------------------------------|
| <b>Bacteria</b>  | <i>Escherichia coli</i>           | <i>Eco</i> ...                   | GADLIFS        | YFALDLA  | EKKILR*                            |
|                  | <i>Mycobacterium tuberculosis</i> | <i>Mtu</i> ...                   | GADIVLT        | YWAVDA   | AAGWLT*                            |
|                  | <i>Vibrio cholerae</i>            | <i>Vch</i> ...                   | GADGILTY       | FAKEVA   | EWLAEDSAKAAQFLPKK*                 |
| <b>Archaea</b>   | <i>Sulfolobus solfataricus</i>    | <i>Sso</i> ...                   | GADLIITY       | YANDIAR  | WIKDGVPF*                          |
| <b>Eukaryota</b> | <b>Fungi</b>                      | <i>Klebsiella lactis</i>         | <i>Kla</i> ... | GARLIISY | FTEPFLEWLDEN*                      |
|                  |                                   | <i>Neurospora crassa</i>         | <i>Ncr</i> ... | GATIIISY | FVPEFLDWLST*                       |
|                  |                                   | <i>Saccharomyces cerevisiae</i>  | <i>Sce</i> ... | GARLIITY | LAPEFLDWLDEEN*                     |
|                  | <b>Metazoa</b>                    | <i>Drosophila melanogaster</i>   | <i>Dme</i> ... | GADCIITY | YTPFLLDIIGKVK*                     |
|                  |                                   | <i>Homo sapiens</i>              | <i>Hsa</i> ... | GADIIITY | YTPQLLQWLKEE*                      |
|                  | <b>Plants/Algae</b>               | <i>Arabidopsis thaliana</i>      | <i>Ath</i> ... | GADIILTY | FALQAATCLCGEKR*                    |
|                  |                                   | <i>Chlamydomonas reinhardtii</i> | <i>Cre</i> ... | GADLILTY | YGIEASKWLAGEK*                     |
|                  |                                   | <i>Oryza sativa</i>              | <i>Osa</i> ... | GADIILTY | FARQAANVLCGMRSN*                   |
|                  |                                   | <i>Pisum sativum</i>             | <i>Psa</i> ... | GADIILTY | FALQAARTLCGEKR*                    |
|                  | <b>Amoebazoa</b>                  | <i>Dictyostelium discoideum</i>  | <i>Ddi</i> ... | GCDIFITY | FTPQLLDWLKL*                       |
|                  | <b>Ciliates</b>                   | <i>Tetrahymena thermophila</i>   | <i>Tth</i> ... | GIDIITY  | FTEPELLDWVKEEF*                    |
|                  | <b>Apicomplexa</b>                | <i>Plasmodium berghei</i>        | <i>Pbe</i> ... | GANIIITY | FAKQYGLYIKNLYEKKIHIEDNNSNPNFV*     |
|                  | (Haemosporidia)                   | <i>Plasmodium falciparum</i>     | <i>Pfa</i> ... | GANIIITY | FAKQYGLYMKKLYDKNIIIDDNSNPNFNI*     |
|                  |                                   | <i>Plasmodium knowlesi</i>       | <i>Pkn</i> ... | GANIIISY | FAKQFGLYLKLNLYNRNVDKEDDLNSPNFNI*   |
|                  |                                   | <i>Plasmodium vivax</i>          | <i>Pvi</i> ... | GANIIISY | FAKQYGLYLKDLDRNVDVDDDLNSPNFNV*     |
|                  |                                   | <i>Plasmodium yoelii</i>         | <i>Pyo</i> ... | GANIIITY | FAKQYGLYIKNLYEKKINIEDNNSNPNFNI*    |
|                  | <b>Apicomplexa</b>                | <i>Eimeria tenella</i>           | <i>Etn</i> ... | GADAIATY | YAKDVAKWMEDDCRSSRSFTEPCY*          |
|                  | (Coccidia)                        | <i>Neospora caninum</i>          | <i>Ncn</i> ... | GADAIATY | YAKEAAKWMVAEDMKGAQKFTEPCY*         |
|                  |                                   | <i>Toxoplasma gondii</i>         | <i>Tgo</i> ... | GADAVATY | YAKEAAKWMVE <u>DMKGTOKFTEPCY</u> * |

Identifiers: *Eco*, NP\_414903.4; *Mtu*, NP\_215026.1; *Vch*, NP\_229764.1; *Sso*, NP\_341737.1; *Kla*, KLLA0F09273g; *Ncr*, NCU01013; *Sce*, YGL040C; *Dme*, CG10335-PA; *Hsa*, ENSP00000363288; *Ath*, At1g69740.1; *Cre*, 186639; *Osa*, 12006.m09435; *Psa*, P30124; *Ddi*, DDB0231415; *Tth*, 91.m00108; *Pbe*, PB000542.01.0; *Pkn*, PF14\_0381; *Pyo*, PKH\_126610-1; *Pvi*, Pv118480; *Pyo*, PY04302; *Etn*, SNAP00000006525; *Ncn*, NC\_LIV\_04110; *Tgo*, 52.m01619

**SUPPLEMENTAL FIGURE S1. Multiple sequence alignment of the PBGS C-terminal region.** Alignment of PBGS proteins from various species with the C-terminal 32 amino acids of *Tg*PBGS (from Gly<sup>627</sup>, which is the last universally conserved amino acid). Sequences and alignments from [OrthoMCL.org](http://OrthoMCL.org), except: *P. sativum*, from [ncbi.nlm.nih.gov/protein](http://ncbi.nlm.nih.gov/protein); *N. caninum*, [ToxoDB.org](http://ToxoDB.org); *E. tenella*, [GeneDB.org](http://GeneDB.org). Note the C-terminal extension found in *Toxoplasma* (underlined) and other apicomplexan parasites (box).

# Shanmugam *et al*, Figure S2

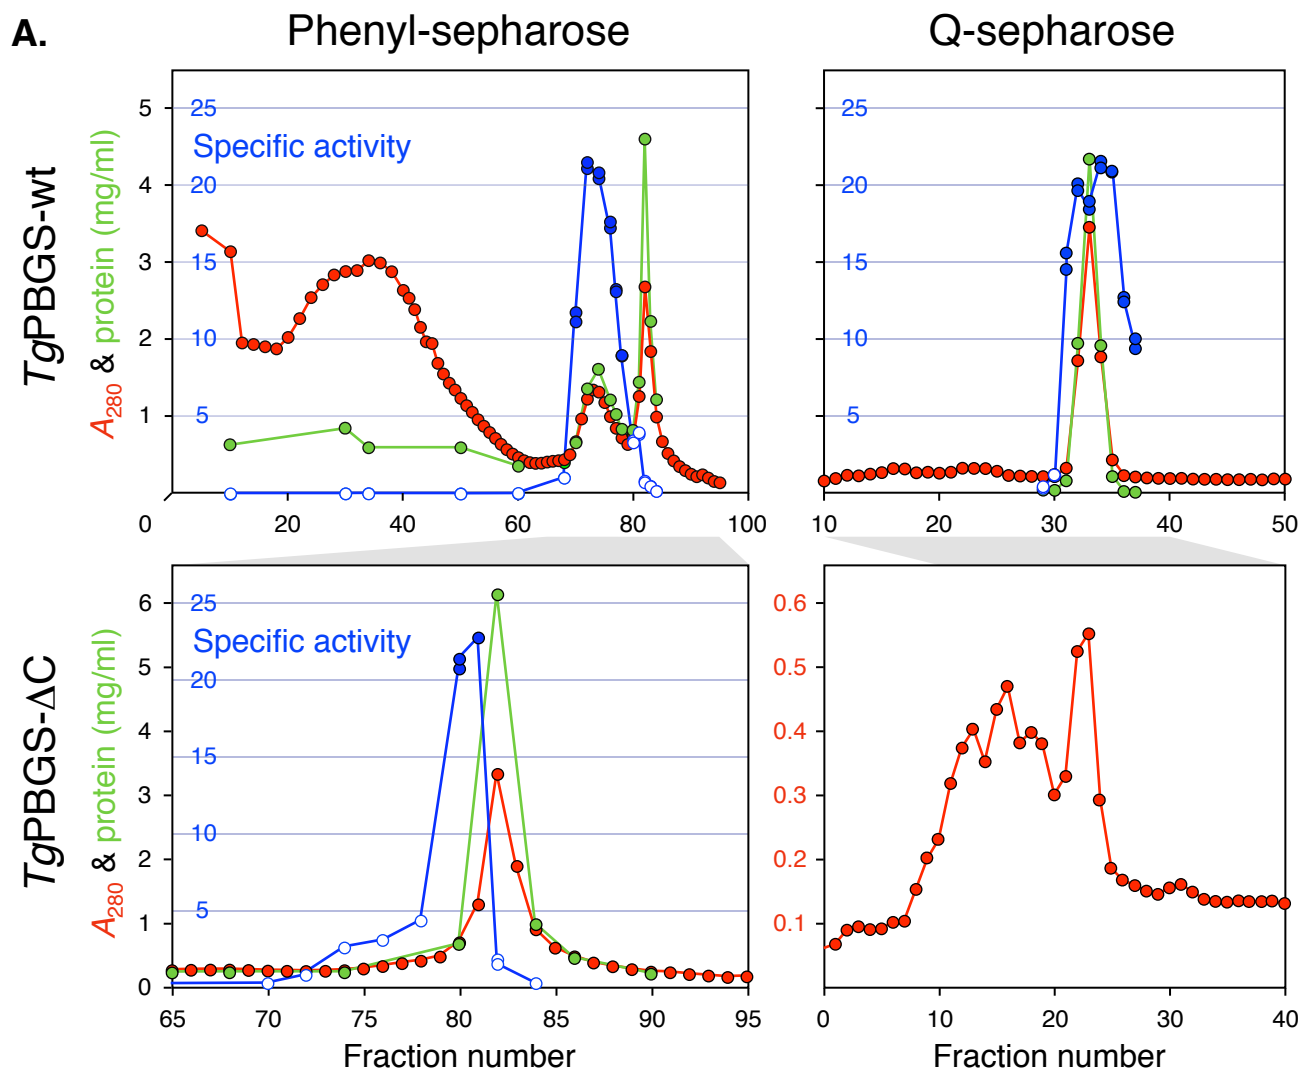

**B.**

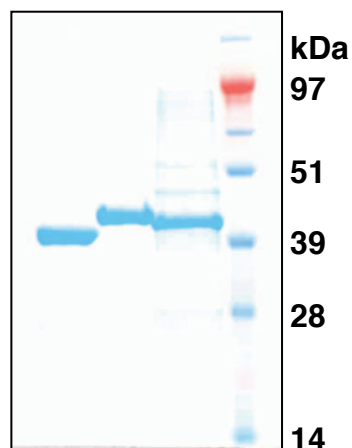

*Hs Tgwt TgΔC*

**SUPPLEMENTAL FIGURE S2. Protein purification profiles.** *A*, Elution of *TgPBGS-wt* (top) and *TgPBGS-DC* from phenyl-Sepharose (left) and Q-Sepharose (right). Protein concentration was determined by Bradford assay; see Methods for further details. Concentrations of *TgPBGS-DC* in individual Q-Sepharose column fractions were too low to assess specific activity. Pooled fractions are indicated by closed blue symbols (except bottom right). *B*, SDS PAGE analysis of Q sepharose eluates. *Hs*, human (for comparison); *Tgwt*, *TgPBGS-wt*; *TgDC*, *TgPBGS-DC*.
